# Supplementary material
Source: publisher figshare collection journal article supplement (https://acs.figshare.com/ndownloader/files/28214902)
Supplement: Supplementary file 1 [file 28214902]

## Supporting Information

### Surface-Enhanced Raman Spectroscopy - Scanning Electrochemical Microscopy: Observation of Real-Time Surface pH Perturbations

Kendrich O. Hatfield, Matthew T. Gole, Noah B. Schorr<sup>‡</sup>, Catherine J. Murphy, Joaquín Rodríguez-López\*

Department of Chemistry, University of Illinois at Urbana–Champaign, 600 South Mathews Avenue, Urbana, Illinois 61801, USA. E-mail: joaquir@illinois.edu; Tel: +1-217-300-7354

<sup>‡</sup>Present Address: Department of Photovoltaics and Materials Technology, Sandia National Laboratories; Albuquerque, New Mexico, USA, 87185

### Contents

|                                                                                   |    |
|-----------------------------------------------------------------------------------|----|
| AgNP and AgNP film characterization                                               | S2 |
| SECM tip positioning                                                              | S3 |
| Peak assignment of 4-mercaptopyridine SERS spectra                                | S4 |
| SERS spectra of 4-mercaptopyridine during chronoamperometric experiment           | S5 |
| SERS spectra of 4-mercaptopyridine before and after chronoamperometric experiment | S6 |
| Cyclic voltammetric SERS-SECM experiment                                          | S7 |

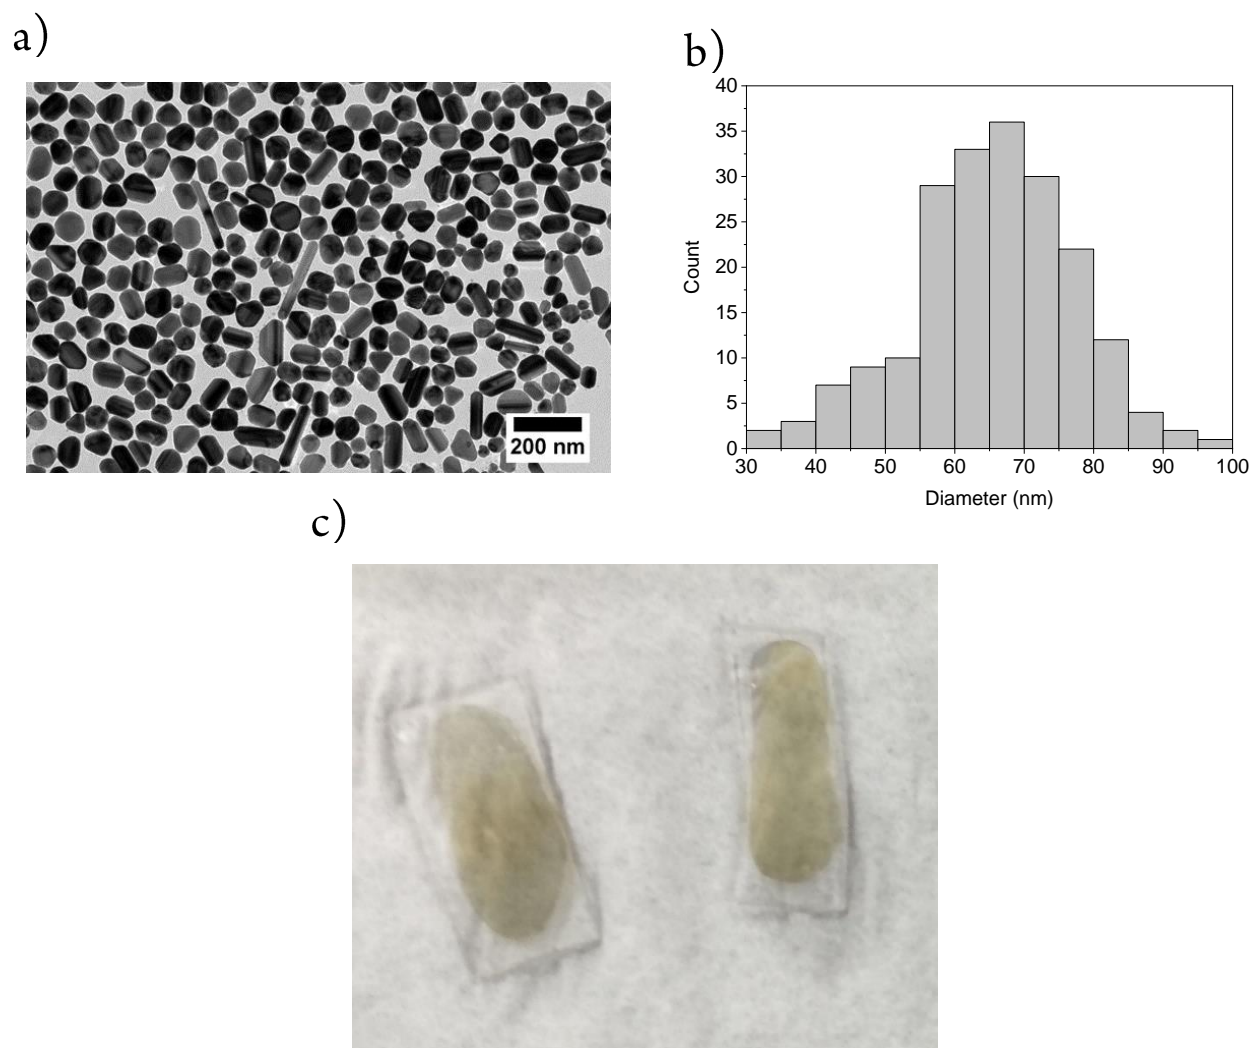

**Figure S1:** Silver nanoparticle characterization. a) TEM image of AgNPs (obtained on a JEOL JEM-2100 TEM). b) Size histogram of AgNPs. c) Photo of AgNP-modified glass slides.

**SECM tip positioning:** To approach the 4MPy/AgNP surface, we biased the SECM tip (Pt, 12.5  $\mu\text{m}$ ) to -0.8 V to achieve steady-state HER, as shown in Figure S2 (top). While using FcMeOH oxidation to approach fits theory<sup>1</sup> better, we opted not to use it for the initial approach since it interfered with our Raman signal. Still, HER allowed reasonable approaches to the substrate, and we carefully changed the solution to a FcMeOH solution at the end of the experiment. FcMeOH approach curves, illustrated in Figure S2 (bottom), show a better fit to theory and roughly agree with the HER approach curves with respect to tip-substrate distance.

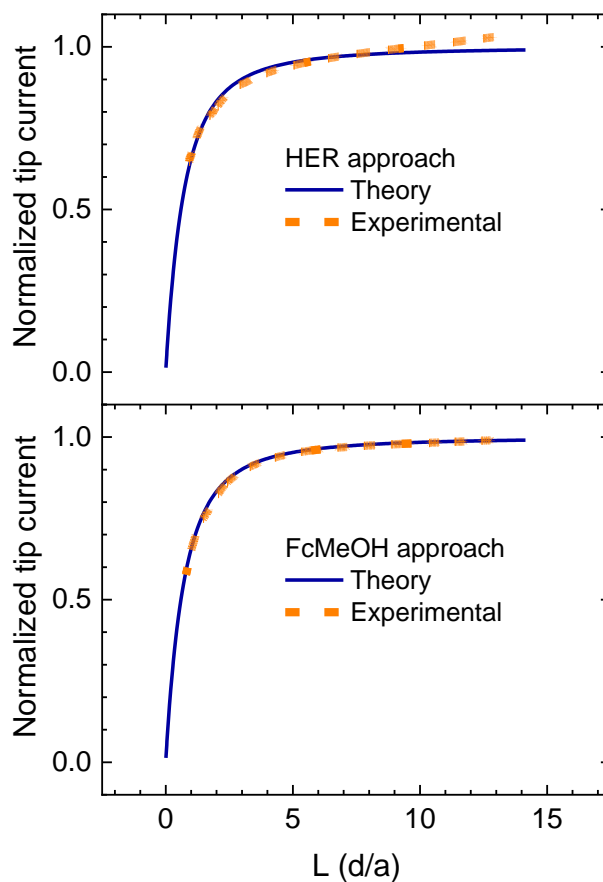

**Figure S2:** Approach curves for the SERS-SECM chronoamperometry experiment. Top) Initial approach curve for using HER (-0.8 V vs Ag/AgCl). Bottom) Approach curve after experiment using FcMeOH oxidation (0.5 V vs Ag/AgCl).

**Peak assignment of 4-mercaptopyridine SERS spectra:** Following peak assignments from Zhang, *et al.*,<sup>2</sup> the peaks at  $1010\text{ cm}^{-1}$  and  $1100\text{ cm}^{-1}$  are associated with ring breathing, with the  $1100\text{ cm}^{-1}$  peak being particularly sensitive to the nature of the C-S bond. Interestingly, we see no significant trend arising between these two peak heights and pH, while others have observed the  $1100\text{ cm}^{-1}$  peak increase in relation to the  $1000\text{ cm}^{-1}$  peak at high pH values.<sup>3,4</sup> We note that Yu, *et al.*,<sup>3</sup> who observe a greater change in these peaks, used a gold substrate; Hu, *et al.*, used silver and observed smaller changes in these peaks. Thus, we speculate that the SERS material may affect how peaks are affected by pH changes. At low pH values, there is a pair of overlapping peaks just above  $1200\text{ cm}^{-1}$ , with the peak closer to  $1200\text{ cm}^{-1}$  disappearing at higher pH values. This agrees with other studies<sup>3,4</sup> and arises because they are both C-H deformation modes, with the left/right peaks associated with

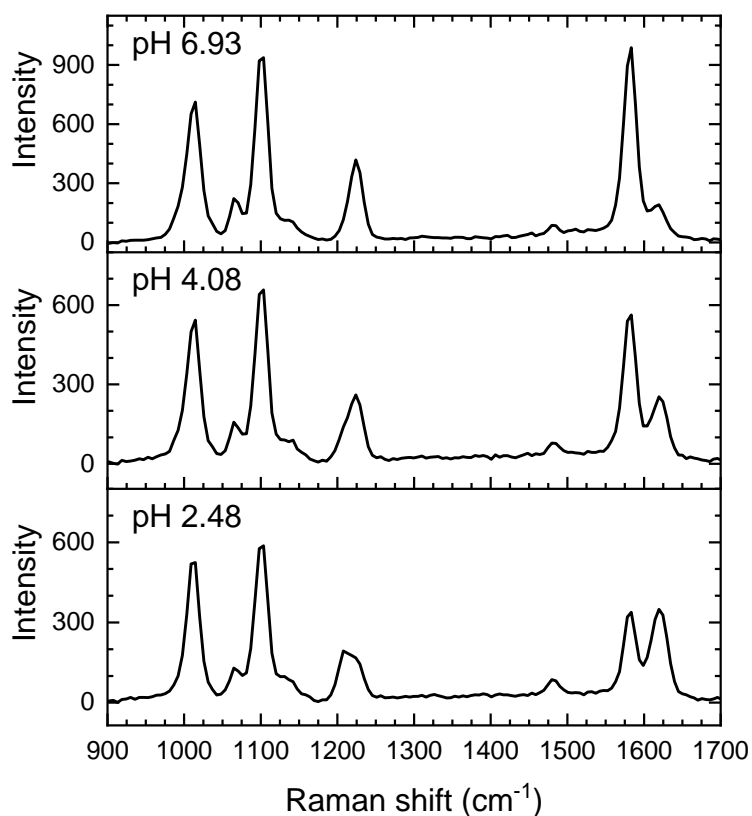

**Figure S3:** Raman spectra of 4MPy in citrate buffer solutions of varying pH

protonated/deprotonated 4MPy, respectively.

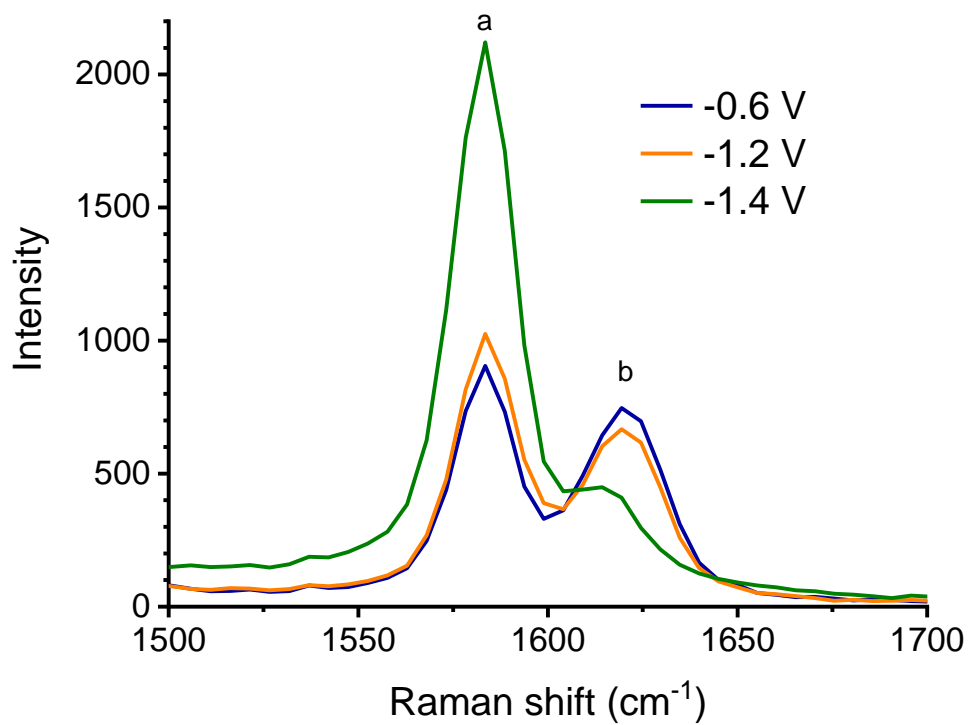

**Figure S4:** SERS spectra of 4MPy/AgNP surface while holding the tip at varying potentials during the chronoamperometric experiment (Figure 3 in the main text).



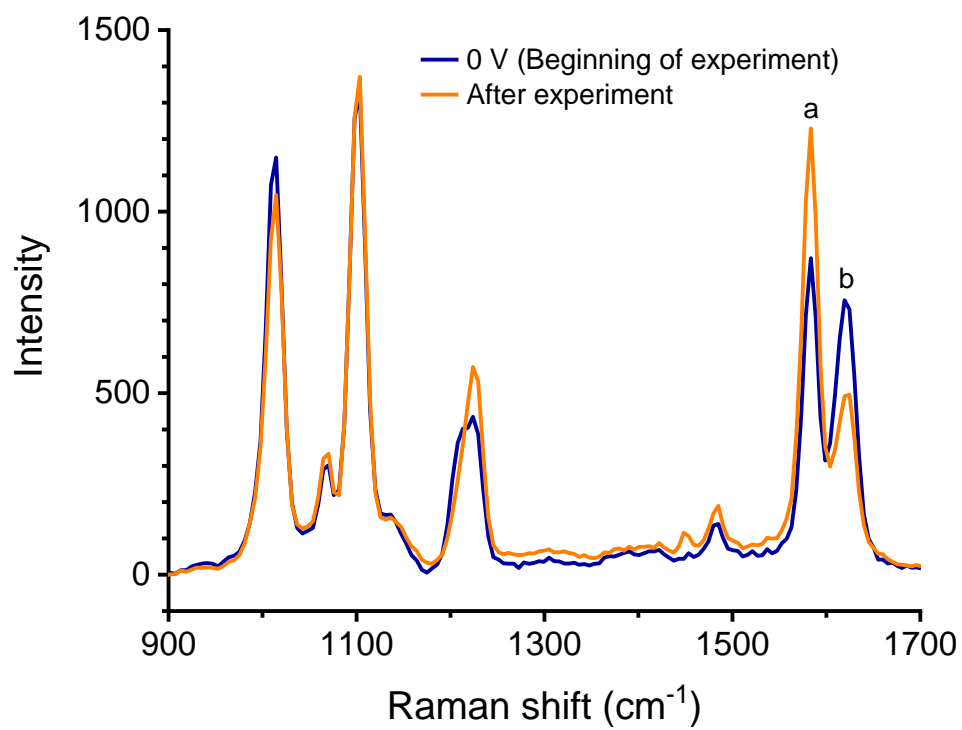

**Figure S5:** SERS spectra of 4MPy/AgNP surface at the beginning (blue) and end (orange) of the chronoamperometric SERS-SECM experiment.

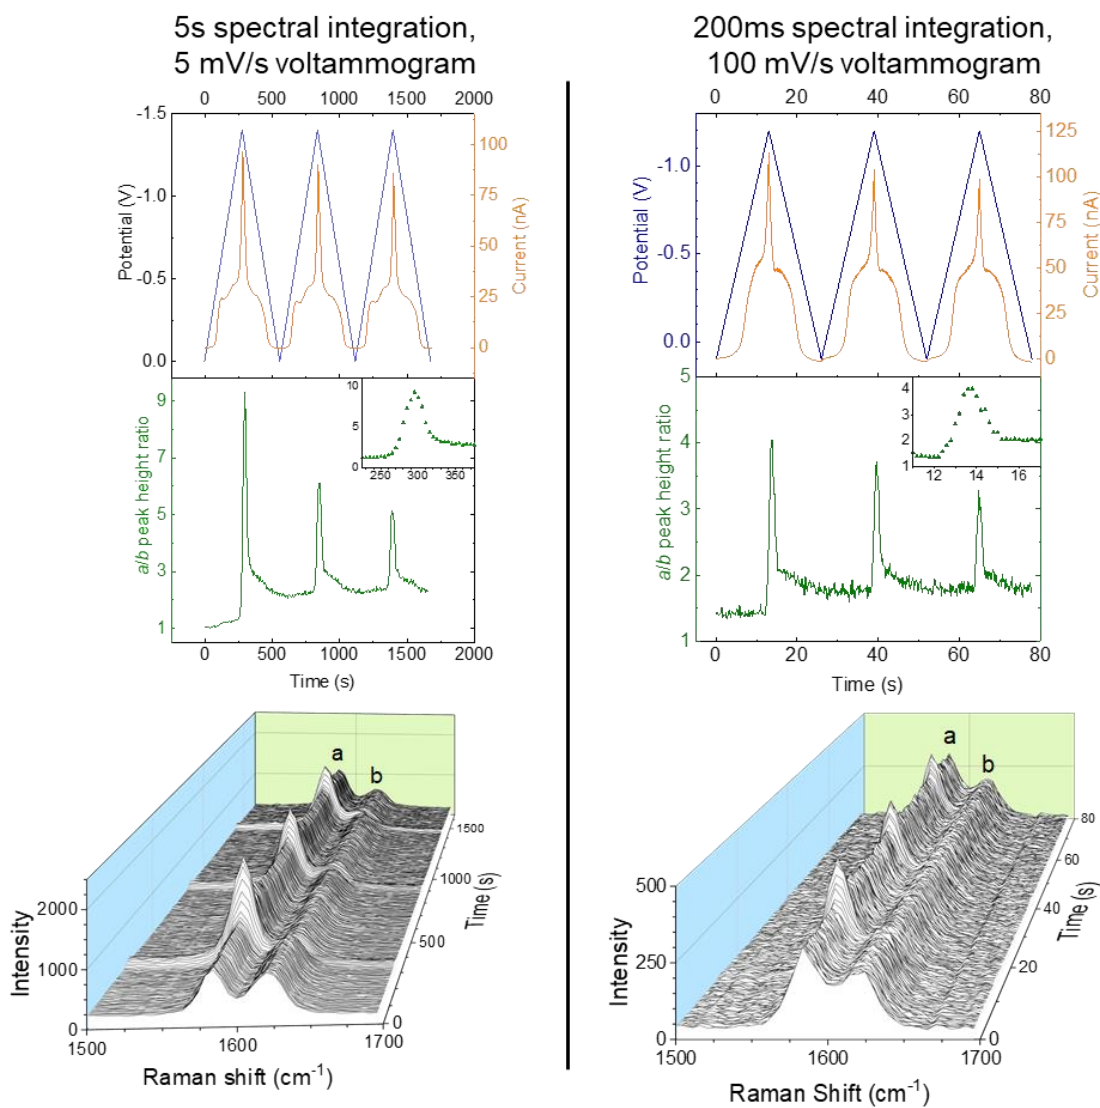

**Figure S6:** Cyclic voltammetric SERS-SECM experiments with both 5 s integration time (left) and 200 ms integration time (right). The top plots display the tip voltammograms and  $a/b$  peak height ratios, while the bottom plots show the spectral region containing these peaks over the course of the experiment. For the 5 s integration experiment, the tip was located 11  $\mu\text{m}$  above the substrate (on a different sample) and the potential scan rate was 5 mV/s.



## References

1. Cornut, R.; Lefrou, C., New Analytical Approximation of Feedback Approach Curves with a Microdisk SECM Tip and Irreversible Kinetic Reaction at the Substrate. *J. Electroanal. Chem.* **2008**, *621* (2), 178-184.
2. Zhang, L.; Bai, Y.; Shang, Z.; Zhang, Y.; Mo, Y., Experimental and Theoretical Studies of Raman Spectroscopy on 4-Mercaptopyridine Aqueous Solution and 4-Mercaptopyridine/Ag Complex System. *J. Raman Spectrosc.* **2007**, *38*, 1106-1111.
3. Yu, H. Z.; Xia, N.; Liu, Z. F., SERS Titration of 4-Mercaptopyridine Self-Assembled Monolayers at Aqueous Buffer/Gold Interfaces. *Anal. Chem* **1999**, *71*, 1354-1358.
4. Hu, J.; Zhao, B.; Xu, W.; Li, B.; Fan, Y., Surface-enhanced Raman Spectroscopy Study on the Structure Changes of 4-mercaptopyridine Adsorbed on Silver Substrates and Silver Colloids. *Spectrochim. Acta Part A* **2002**, *58*, 2827-2834.
